# Supplementary material for: Salinity effect on production of PHA and EPS byHaloferax mediterranei
Source: Royal Society of Chemistry journal article supplement (doi:10.1039/c7ra09652f), 2017-01-01
Supplement: c7ra09652f1.pdf [file c7ra09652f1.pdf]

ESI

| NaCl concentration | CDW g | error bar | PHA mg/mg<br>CDW | error bar | EPS mg/g<br>CDW | error bar |
|--------------------|-------|-----------|------------------|-----------|-----------------|-----------|
| 75g/l              | 3.62  | 0.26      | 46.69691         | 2.93      | 371.36          | 24.9      |
| 150g/l             | 4.08  | 0.25      | 57.72388         | 2.33      | 345.56          | 19.5      |
| 200g/l             | 4.15  | 0.36      | 61.40637         | 2.81      | 313.93          | 24.9      |
| 250g/l             | 3.6   | 0.169     | 71.12684         | 4.14      | 319.74          | 24.2      |
